# Supplementary material for: α,ω-Di(glycerol carbonate) telechelic polyesters and polyolefins as precursors to polyhydroxyurethanes: an isocyanate-free approach
Source: Royal Society of Chemistry journal article supplement (doi:10.1039/c3gc41821a), 2013-11-19
Supplement: c3gc41821a.pdf [file c3gc41821a.pdf]

**$\alpha,\omega$ -Di(glycerol carbonate) Telechelic Polyesters and Polyolefins  
as Precursors to PolyHydroxyUrethanes: an Isocyanate-free approach**

Liana Annunziata,<sup>a</sup> Abdou K. Diallo,<sup>a</sup> Stéphane Fouquay,<sup>b</sup> Guillaume Michaud,<sup>c</sup> Frédéric  
Simon,<sup>c</sup> Jean-François Carpentier,<sup>a</sup> and Sophie M. Guillaume<sup>1,a</sup>

<sup>a</sup> Institut des Sciences Chimiques de Rennes, Organometallics, Materials and Catalysis, UMR  
6226 CNRS-Université de Rennes 1, Campus de Beaulieu, F-35042 Rennes Cedex, France

<sup>b</sup> BOSTIK S.A. 16-32, rue H. Regnault, 92902 Paris La Défense (France)

<sup>c</sup> BOSTIK CRD, Route de Bailly, 60771 Ribécourt Cedex (France)

---

<sup>1</sup> Corresponding author : Tel: +33 223235880; [sophie.guillaume@univ-rennes1.fr](mailto:sophie.guillaume@univ-rennes1.fr)

## Electronic Supplementary Information

### $\alpha,\omega$ -Di(glycerol carbonate) Telechelic Polyesters and Polyolefins

#### as Precursors to PolyHydroxyUrethanes: an Isocyanate-free approach

**Figure S1.**  $^1\text{H}$  NMR (500 MHz,  $\text{CDCl}_3$ , 25 °C) spectrum of 4-tosylmethyl-1,3-dioxolan-2-one (GC-OTs) (\* stands for residual solvent resonances)

**Figure S2.**  $^{13}\text{C}\{^1\text{H}\}$  NMR (125 MHz,  $\text{CDCl}_3$ , 25 °C) spectrum of 4-tosylmethyl-1,3-dioxolan-2-one (GC-OTs) (\* stands for residual solvent resonances)

**Figure S3.**  $^1\text{H}$  NMR (500 MHz,  $\text{CDCl}_3$ , 25 °C) spectra of  $\text{PPG}_{400,1600,2800}\text{-GC}_2$  prepared from the reaction of the corresponding  $\text{PPG}_{400,1600,2800}\text{-OH}_2$  with GC-OTS.

**Figure S4.**  $^1\text{H}$  NMR (500 MHz,  $\text{CDCl}_3$ , 25 °C) spectrum of  $\text{PPG}_{400}\text{-OH}_2$  (\* stands for residual solvent resonances, and x stands for an unidentified impurity).

**Figure S5.**  $^1\text{H}\text{-}^1\text{H}$  COSY NMR (500 MHz,  $\text{CDCl}_3$ , 25 °C) spectrum of  $\text{PPG}_{400}\text{-GC}_2$ .

**Figure S6.**  $^1\text{H}\text{-}^{13}\text{C}$  (DEPT) HMQC NMR spectrum (500 MHz,  $\text{CDCl}_3$ , 25 °C) of  $\text{PPG}_{400}\text{-GC}_2$ .

**Figure S7.** (a)  $^1\text{H}$  (500 MHz,  $\text{CDCl}_3$ , 25 °C) and (b)  $^{13}\text{C}\{^1\text{H}\}$  (125 MHz,  $\text{CDCl}_3$ , 25 °C) NMR spectra of  $\text{PEG}_{400}\text{-OH}_2$ .

**Figure S8.**  $^1\text{H}$  NMR (500 MHz,  $\text{CDCl}_3$ , 25 °C) spectrum of the  $\text{PEG}_{400}\text{-GC}_2$ .

**Figure S9.**  $^{13}\text{C}\{^1\text{H}\}$  NMR (125 MHz,  $\text{CDCl}_3$ , 25 °C) spectrum of the  $\text{PEG}_{400}\text{-GC}_2$ .

**Figure S10.**  $^1\text{H}\text{-}^1\text{H}$  COSY NMR (500 MHz,  $\text{CDCl}_3$ , 25 °C) spectrum of the  $\text{PEG}_{400}\text{-GC}_2$ .

**Figure S11.** FTIR spectra of  $\text{PEG}_{400}\text{-OH}_2$  (black trace) and the resulting  $\text{PEG}_{400}\text{-GC}_2$  (red trace).

**Figure S12.**  $^1\text{H}$  NMR (500 MHz,  $\text{CDCl}_3$ , 25 °C) spectrum of the  $\text{PEE}\text{-OH}_2$ .

**Figure S13.**  $^{13}\text{C}\{^1\text{H}\}$  NMR (125 MHz,  $\text{CDCl}_3$ , 25 °C) spectrum of the  $\text{PEE}\text{-OH}_2$ .

**Figure S14.**  $^1\text{H}$  NMR (500 MHz,  $\text{CDCl}_3$ , 25 °C) spectrum of PEE-GC<sub>2</sub> (\* marker stands for residual toluene and \*\* for the starting reagent).

**Figure S15.**  $^{13}\text{C}\{^1\text{H}\}$  NMR (125 MHz,  $\text{CDCl}_3$ , 25 °C) spectrum of PEE-GC<sub>2</sub> (\* marker stands for residual toluene).

**Figure S16.**  $^1\text{H}$ - $^1\text{H}$  COSY NMR spectrum (500 MHz,  $\text{CDCl}_3$ , 25 °C) of PEE-GC<sub>2</sub>.

**Figure S17.**  $^1\text{H}$ - $^{13}\text{C}$  (DEPT) HMQC NMR spectrum (500 MHz,  $\text{CDCl}_3$ , 25 °C) of PEE-GC<sub>2</sub>.

**Figure S18.** FTIR spectra of PEE-OH<sub>2</sub> (black trace) and the resulting PEE-GC<sub>2</sub> (red trace).

**Figure S19.** MALDI-ToF MS spectrum of PEE-GC<sub>2</sub>.

**Figure S20.**  $^1\text{H}$  NMR (500 MHz,  $\text{CDCl}_3$ , 25 °C) spectrum of PBD-OH<sub>2</sub>.

**Figure S21.**  $^1\text{H}$  NMR (500 MHz,  $\text{CDCl}_3$ , 25 °C) spectrum of PBD-GC<sub>2</sub> (\* marker stands for residual toluene).

**Figure S22.**  $^{13}\text{C}\{^1\text{H}\}$  NMR (125 MHz,  $\text{CDCl}_3$ , 25 °C) spectrum of PBD-GC<sub>2</sub>.

**Figure S23.**  $^1\text{H}$ - $^1\text{H}$  COSY NMR (500 MHz,  $\text{CDCl}_3$ , 25 °C) spectrum of PBD-GC<sub>2</sub>.

**Figure S24.** FTIR spectra of PBD-OH<sub>2</sub> (black trace) and the resulting PBD-GC<sub>2</sub> (red trace).

**Scheme S1.** Synthesis of 4-tosylmethyl-1,3-dioxolan-2-one (GC-OTs).

**Table S1.**  $\alpha,\omega$ -Dihydroxy and dicyclocarbonate telechelic PEGs characteristics.

**Table S2.**  $\alpha,\omega$ -Dihydroxy and dicyclocarbonate telechelic PEE characteristics.

**Table S3.**  $\alpha,\omega$ -Dihydroxy and dicyclocarbonate telechelic PBD characteristics.

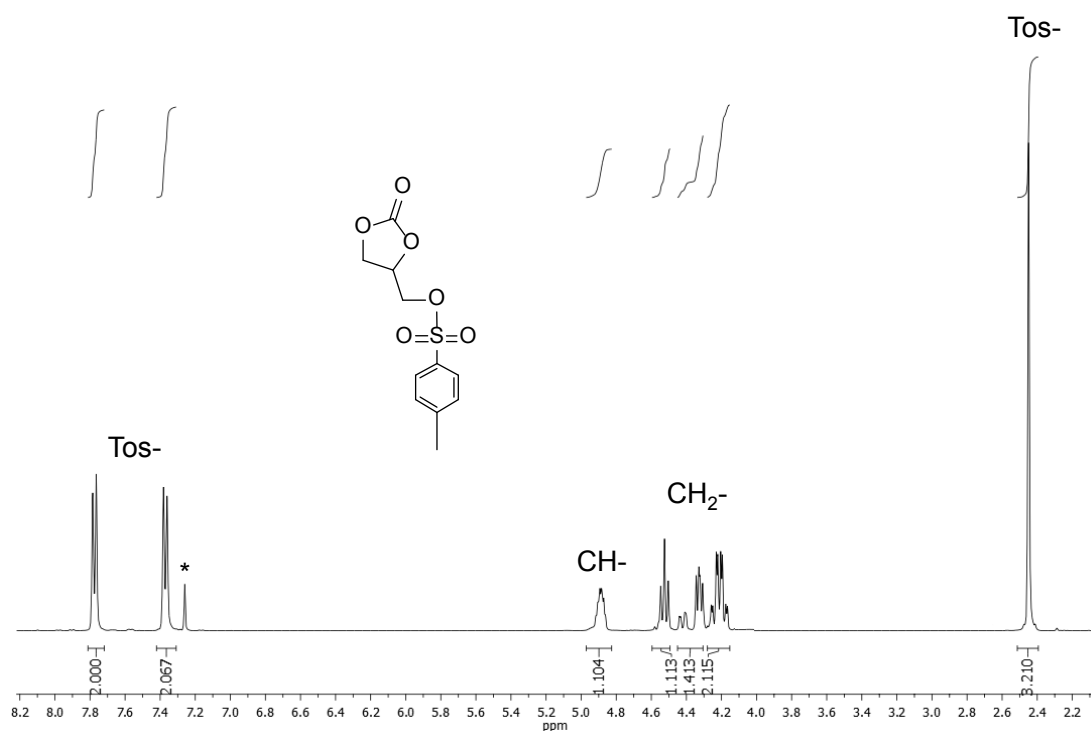

**Figure S1.**  $^1\text{H}$  NMR (500 MHz,  $\text{CDCl}_3$ , 25 °C) spectrum of 4-tosylmethyl-1,3-dioxolan-2-one (GC-OTs) (\* stands for residual solvent resonances).

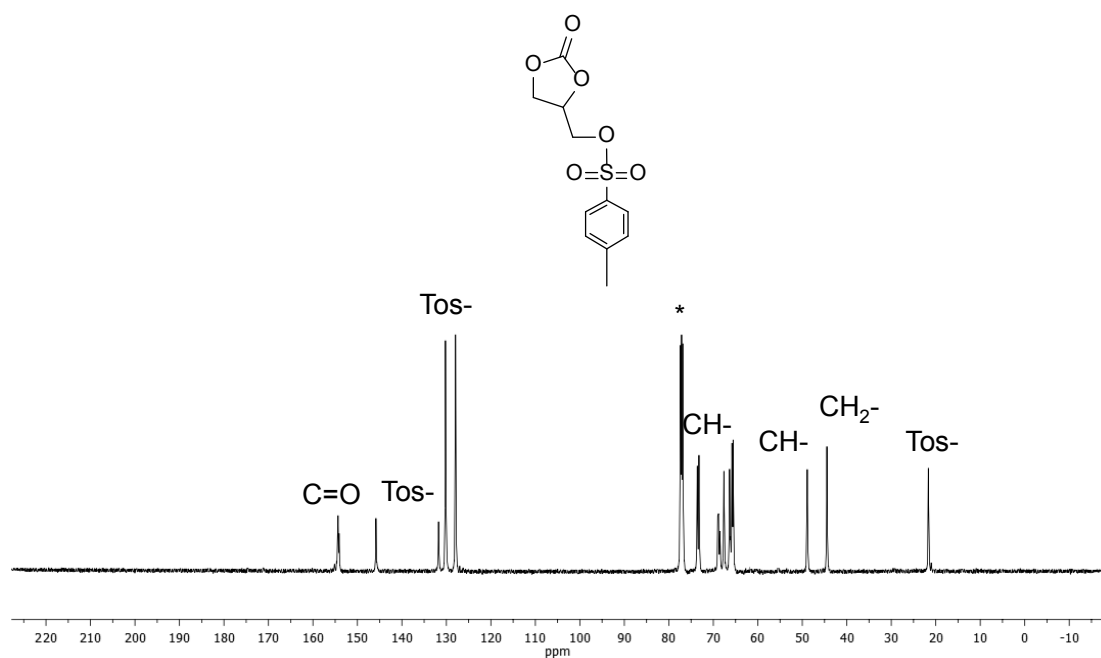

**Figure S2.**  $^{13}\text{C}\{^1\text{H}\}$  NMR (125 MHz,  $\text{CDCl}_3$ , 25 °C) spectrum of 4-tosylmethyl-1,3-dioxolan-2-one (GC-OTs) (\* stands for residual solvent resonances).

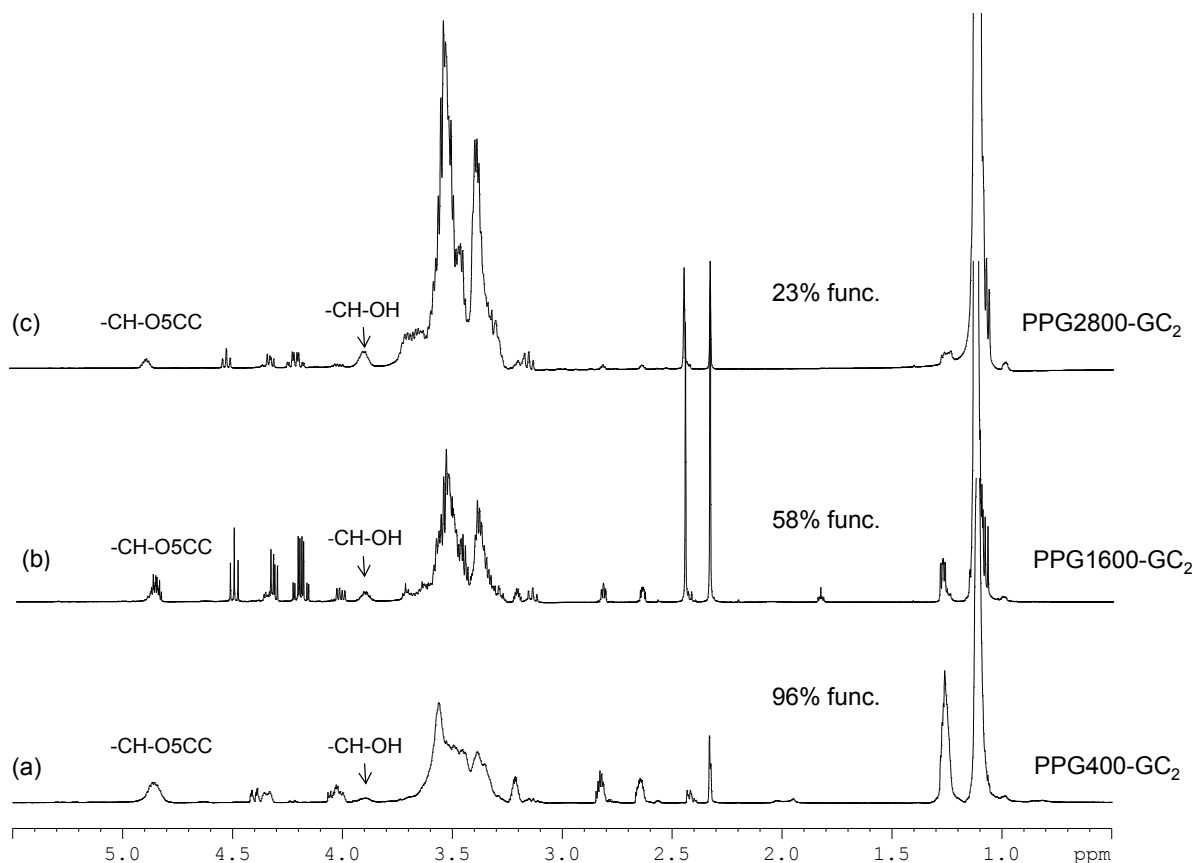

**Figure S3.**  $^1\text{H}$  NMR (500 MHz,  $\text{CDCl}_3$ , 25 °C) spectra of  $\text{PPG}_{400,1600,2800}\text{-GC}_2$  prepared from the reaction of the corresponding  $\text{PPG}_{400,1600,2800}\text{-OH}_2$  with GC-OTS.

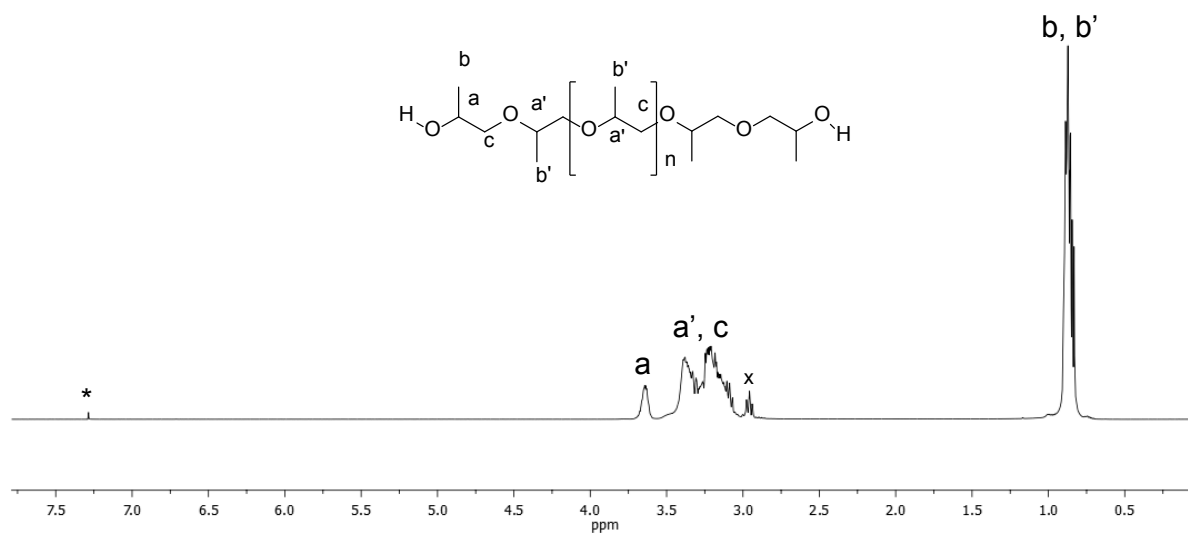

**Figure S4.**  $^1\text{H}$  NMR (500 MHz,  $\text{CDCl}_3$ , 25 °C) spectrum of  $\text{PPG}_{400}\text{-OH}_2$  (\* stands for residual solvent resonances, and x stands for an unidentified impurity).

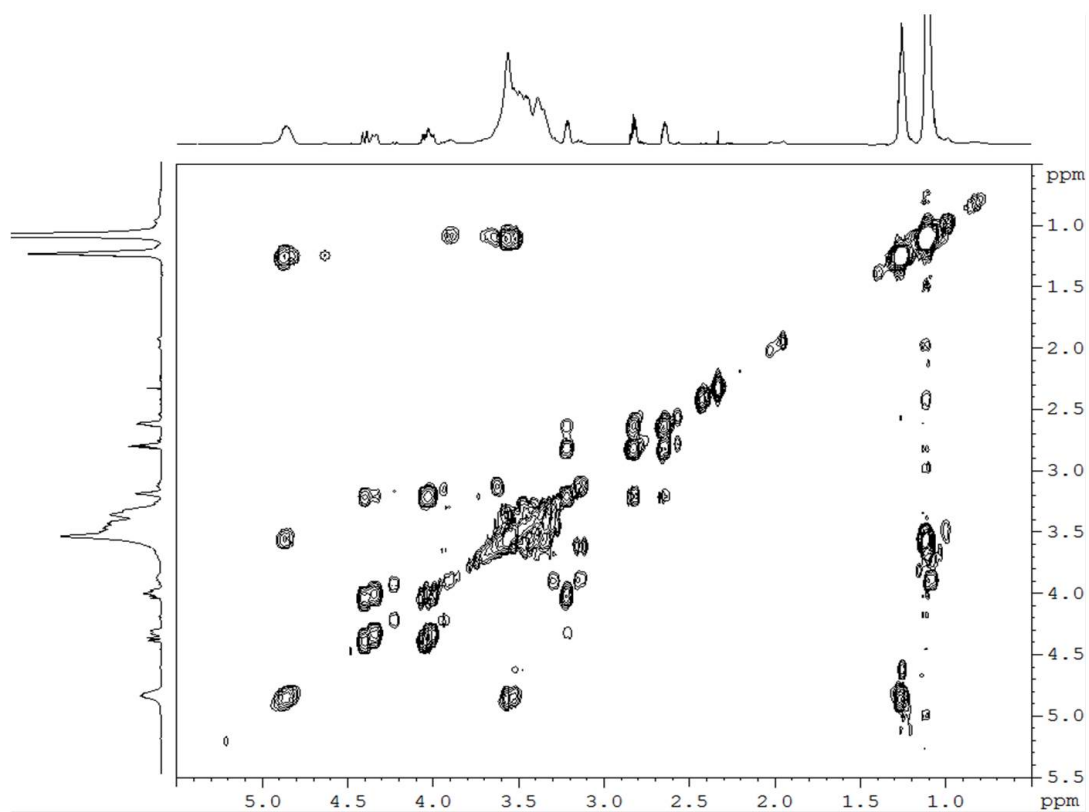

**Figure S5.**  $^1\text{H}$ - $^1\text{H}$  COSY NMR (500 MHz,  $\text{CDCl}_3$ , 25 °C) spectrum of PPG<sub>400</sub>-GC<sub>2</sub>.

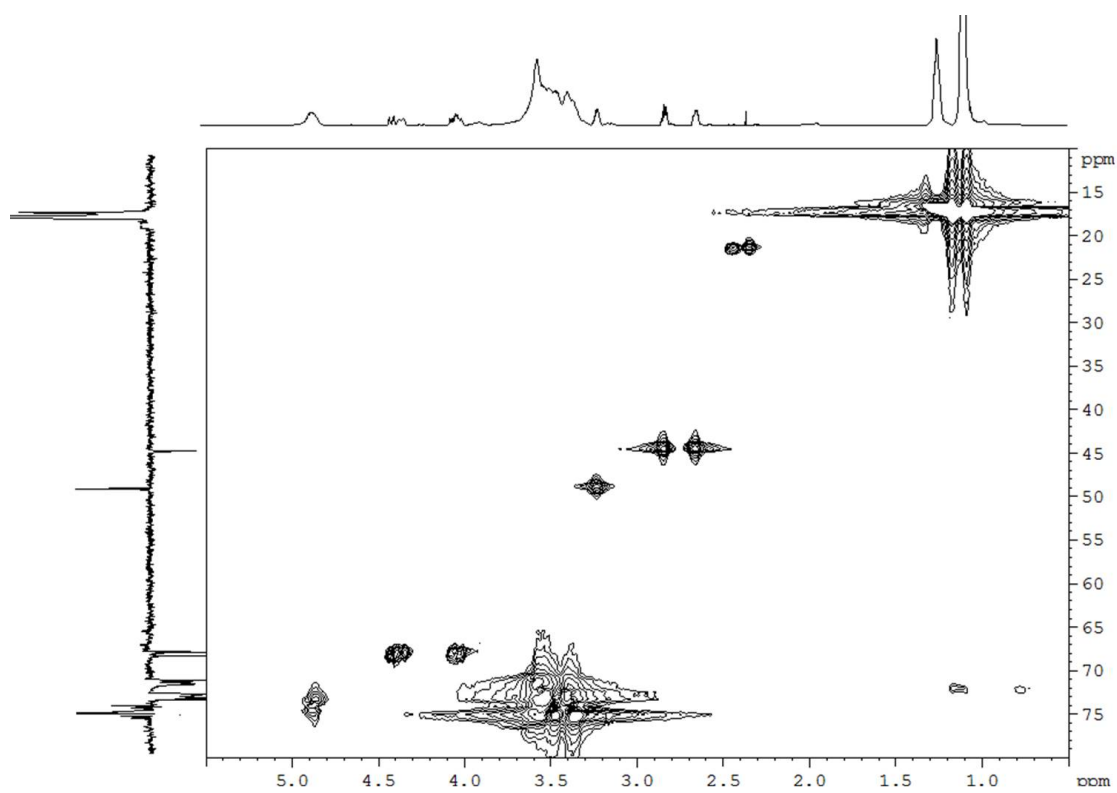

**Figure S6.**  $^1\text{H}$ - $^{13}\text{C}$  (DEPT) HMQC NMR spectrum (500 MHz,  $\text{CDCl}_3$ , 25 °C) of PPG<sub>400</sub>-GC<sub>2</sub>.

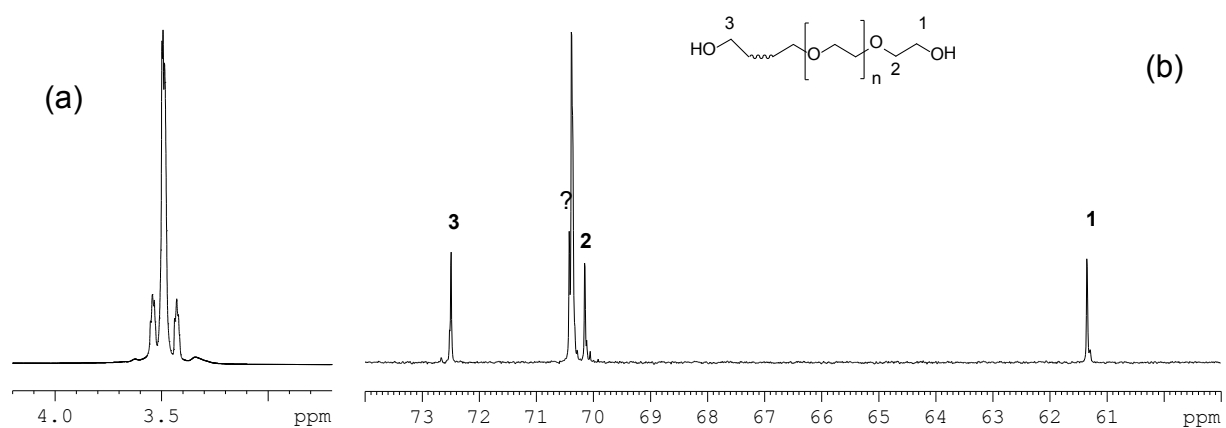

**Figure S7.** (a) <sup>1</sup>H (500 MHz, CDCl<sub>3</sub>, 25 °C) and (b) <sup>13</sup>C {<sup>1</sup>H} (125 MHz, CDCl<sub>3</sub>, 25 °C) NMR spectra of PEG<sub>400</sub>-OH<sub>2</sub>.

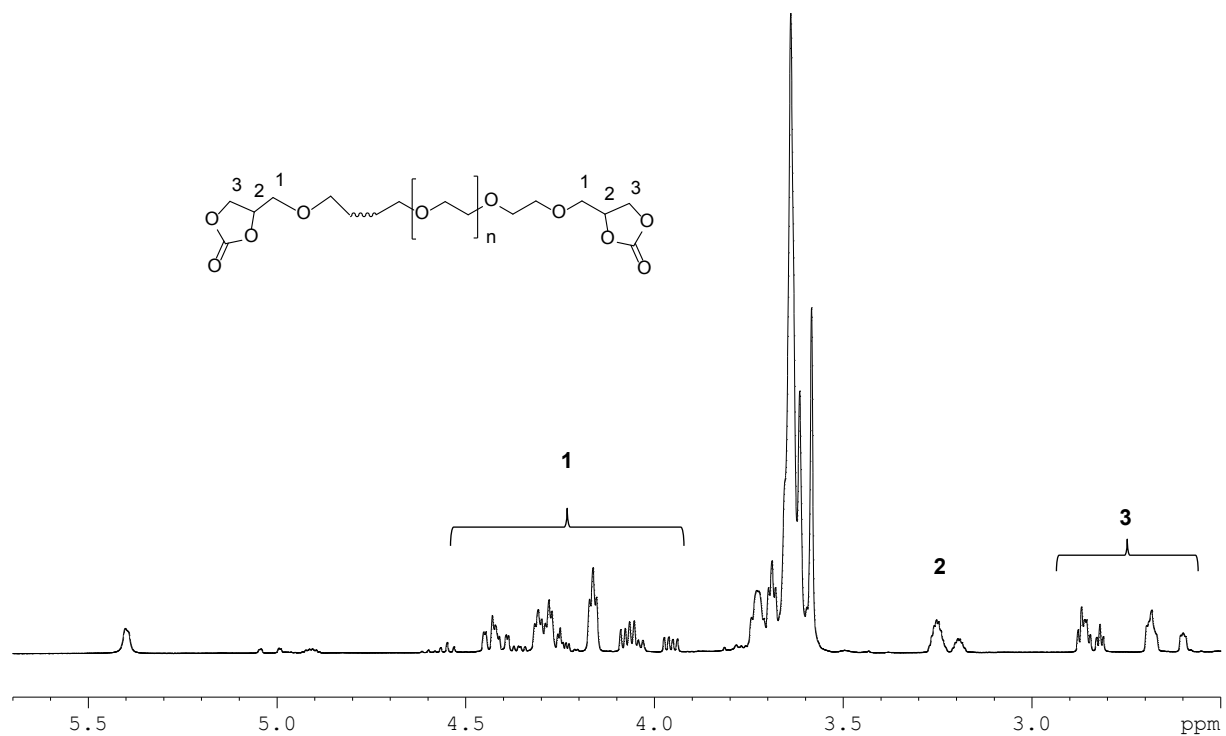

**Figure S8.** <sup>1</sup>H NMR (500 MHz, CDCl<sub>3</sub>, 25 °C) spectrum of the PEG<sub>400</sub>-GC<sub>2</sub>.

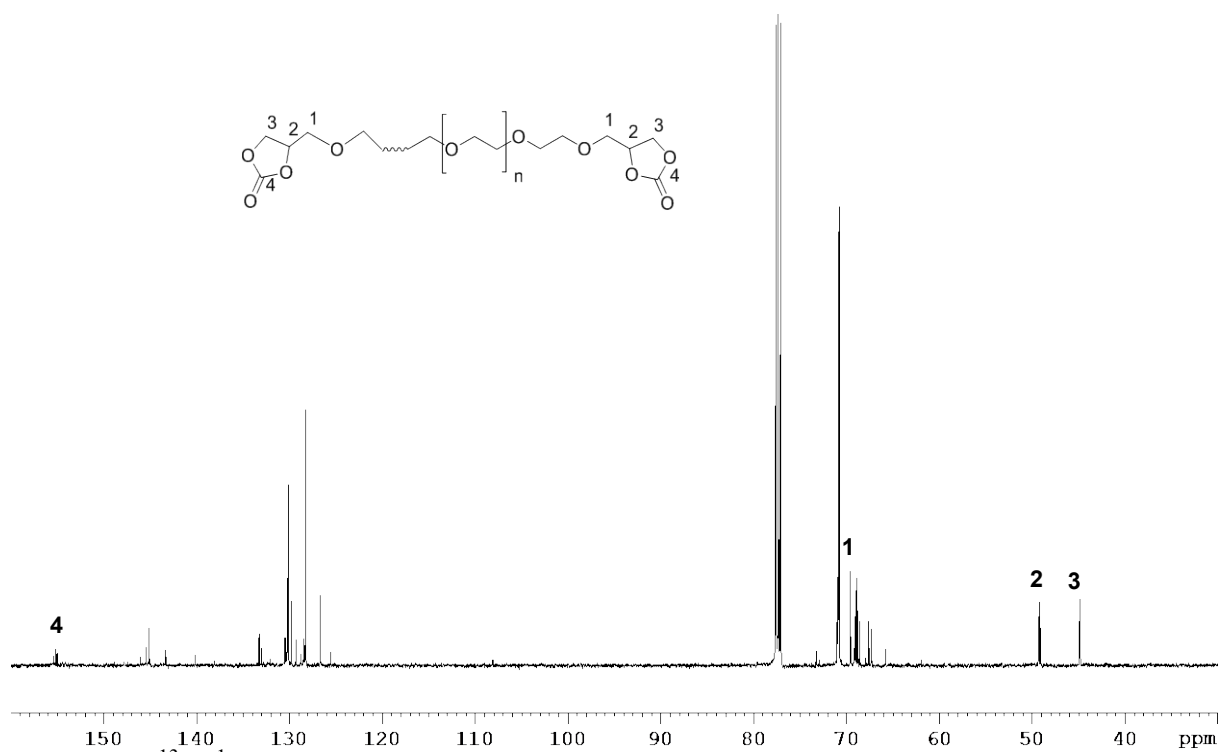

**Figure S9.** <sup>13</sup>C{<sup>1</sup>H} NMR (125 MHz, CDCl<sub>3</sub>, 25 °C) spectrum of the PEG<sub>400</sub>-GC<sub>2</sub>.

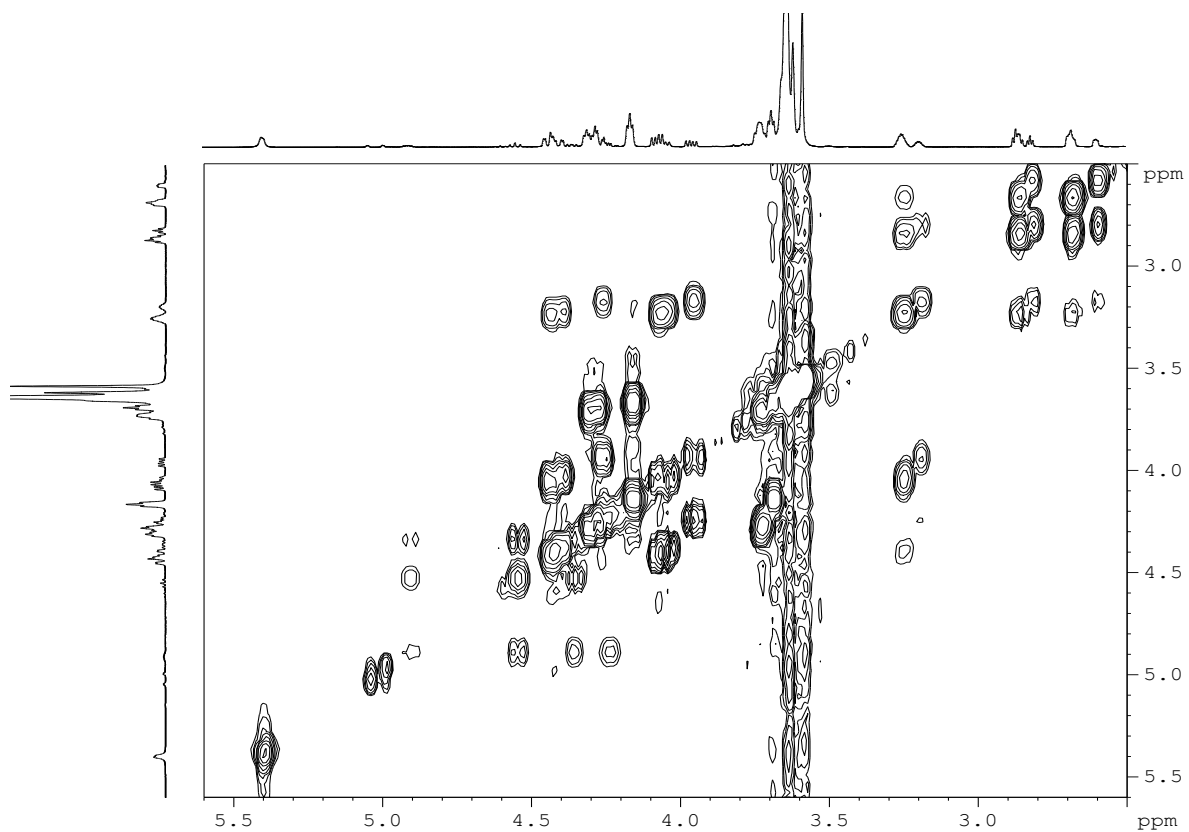

**Figure S10.** <sup>1</sup>H-<sup>1</sup>H COSY NMR (500 MHz, CDCl<sub>3</sub>, 25 °C) spectrum of the PEG<sub>400</sub>-GC<sub>2</sub>.



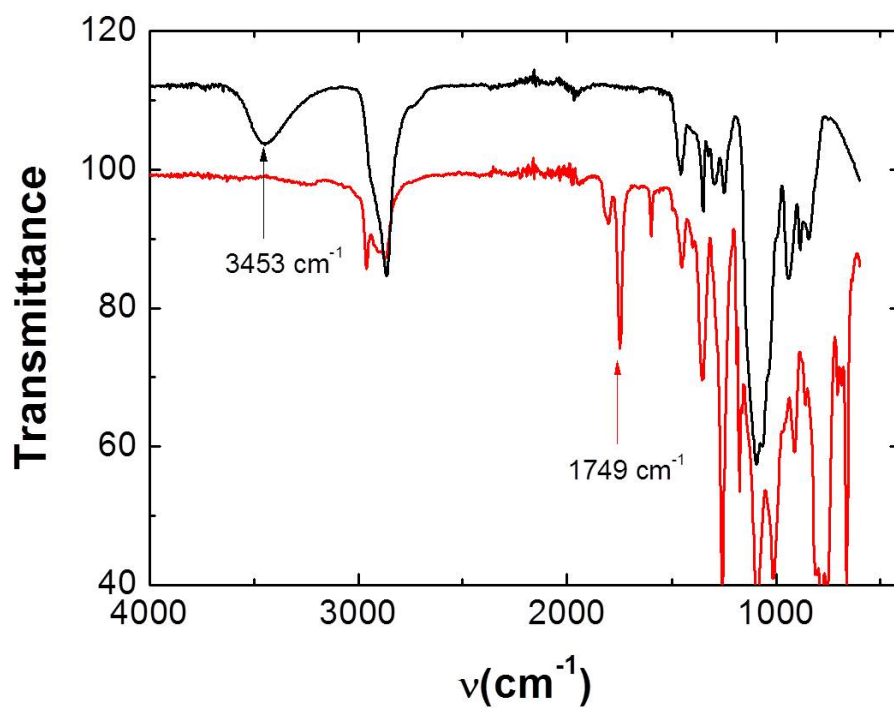

**Figure S11.** FTIR spectra of PEG<sub>400</sub>-OH<sub>2</sub> (black trace) and the resulting PEG<sub>400</sub>-GC<sub>2</sub> (red trace).

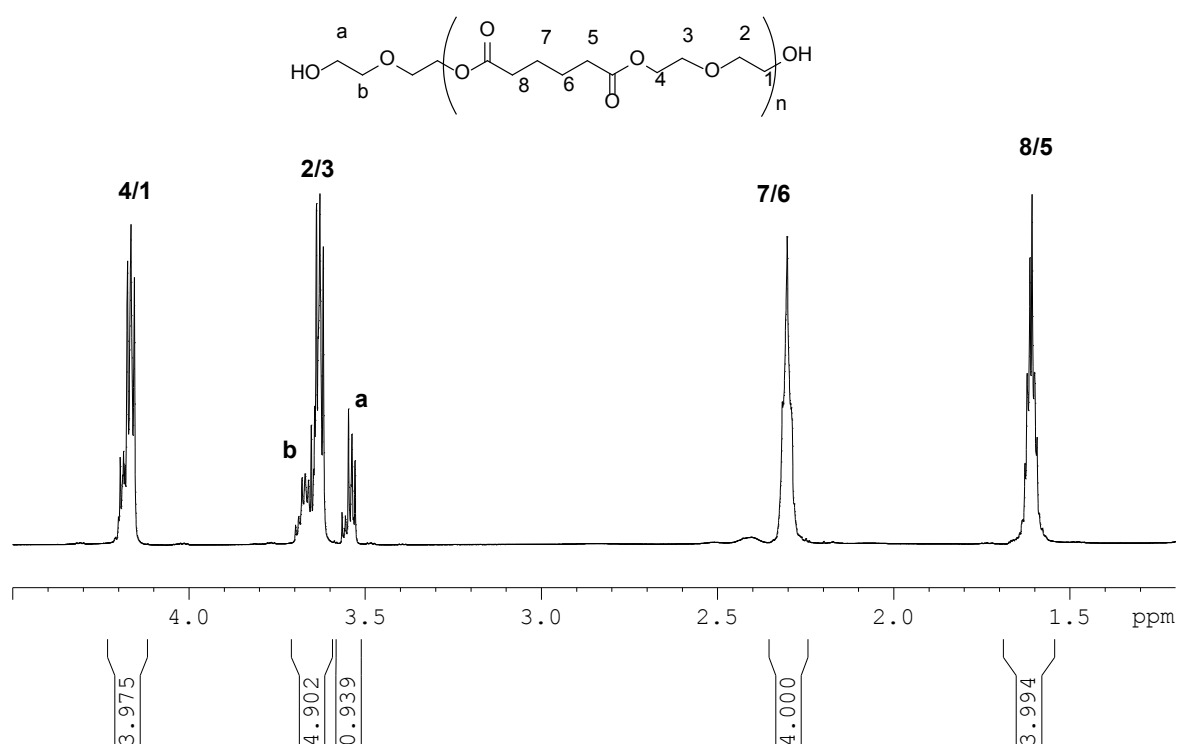

**Figure S12.** <sup>1</sup>H NMR (500 MHz, CDCl<sub>3</sub>, 25 °C) spectrum of the PEE-OH<sub>2</sub>.

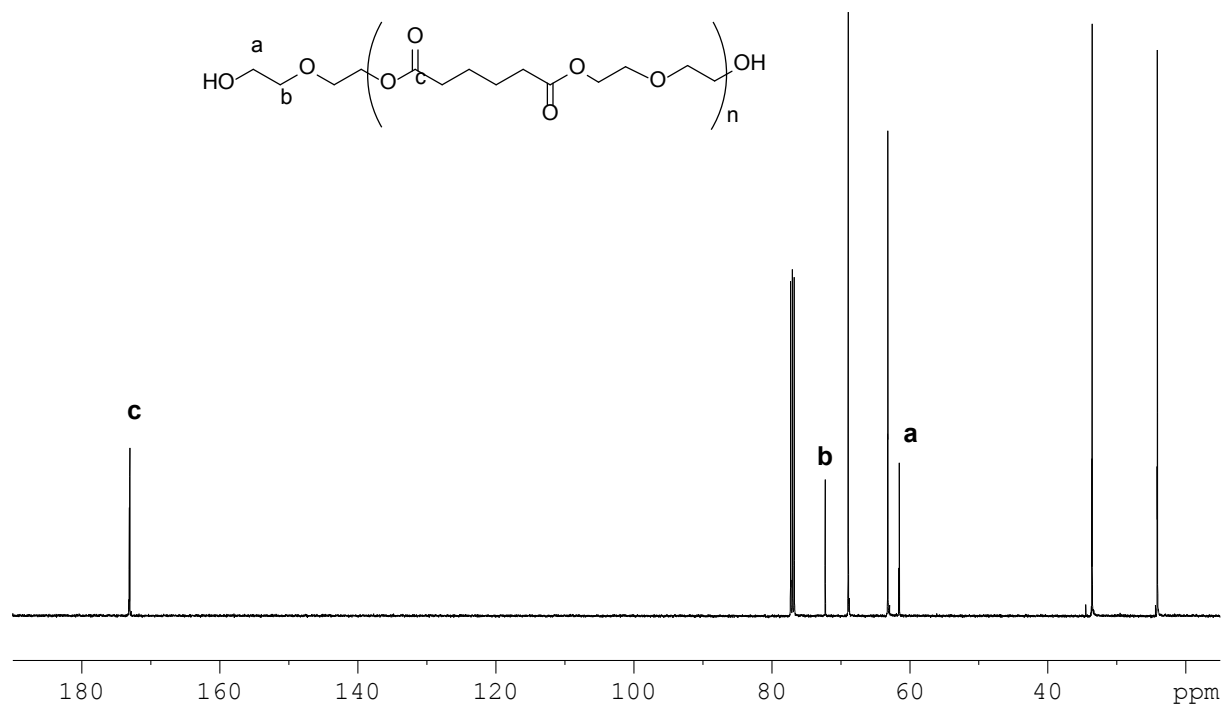

**Figure S13.** <sup>13</sup>C{<sup>1</sup>H} NMR (125 MHz, CDCl<sub>3</sub>, 25 °C) spectrum of the PEE-OH<sub>2</sub>.

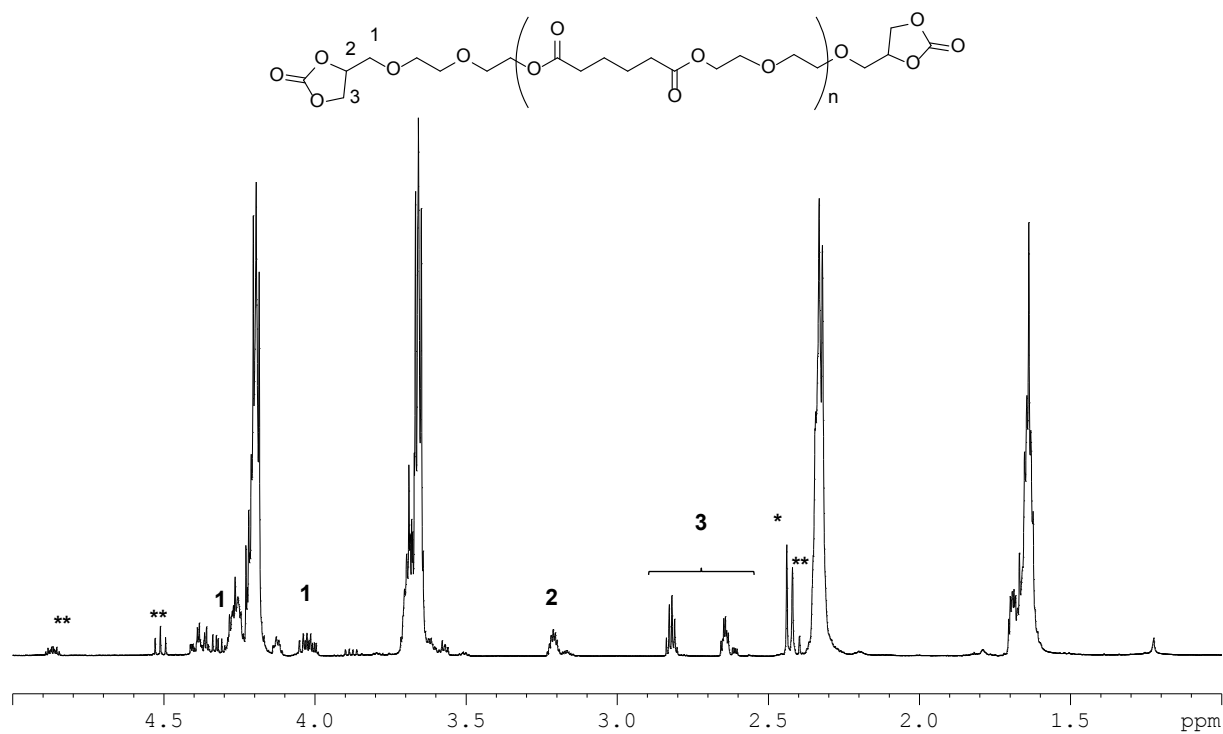

**Figure S14.** <sup>1</sup>H NMR (500 MHz, CDCl<sub>3</sub>, 25 °C) spectrum of PEE-GC<sub>2</sub> (\* marker stands for residual toluene and \*\* for the starting reagent).

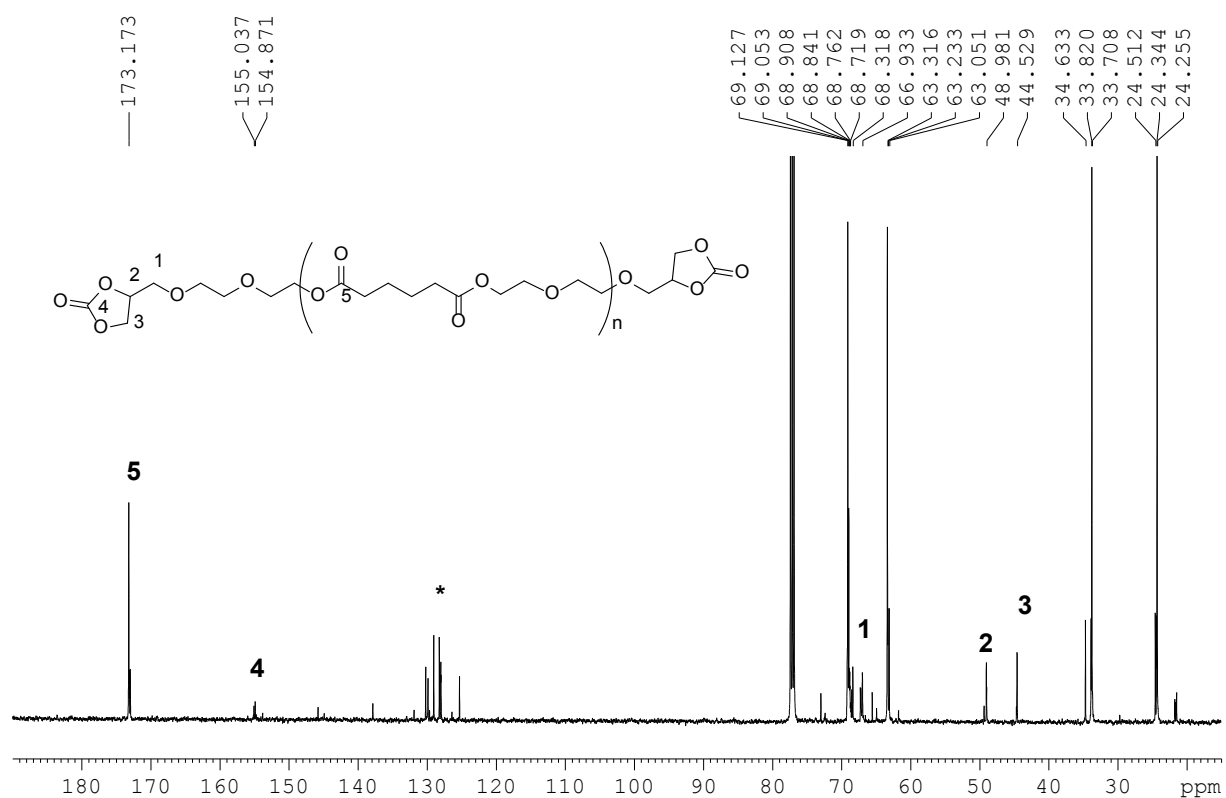

**Figure S15.**  $^{13}\text{C}\{^1\text{H}\}$  NMR (125 MHz,  $\text{CDCl}_3$ , 25 °C) spectrum of PEE-GC<sub>2</sub> (\* marker stands for residual toluene).

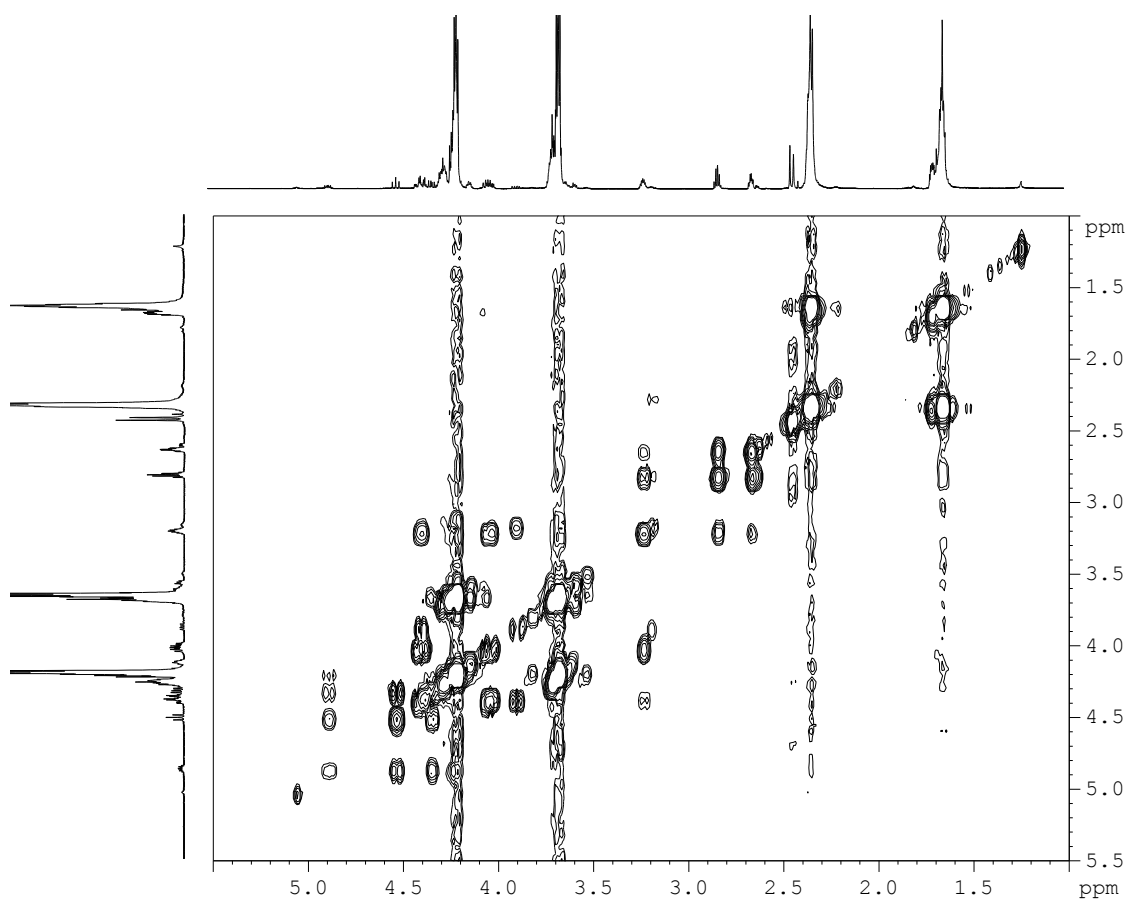

Figure S16.  $^1\text{H}$ - $^1\text{H}$  COSY NMR spectrum (500 MHz,  $\text{CDCl}_3$ , 25 °C) of PEE- $\text{GC}_2$ .

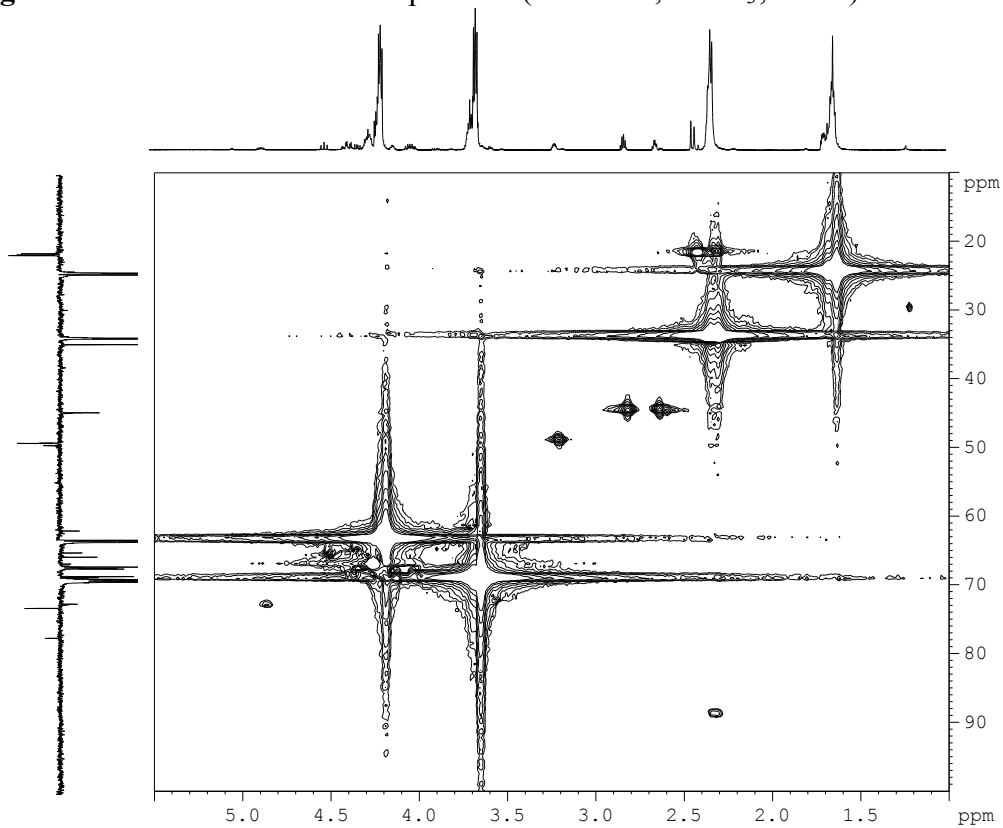

Figure S17.  $^1\text{H}$ - $^{13}\text{C}$  (DEPT) HMQC NMR spectrum (500 MHz,  $\text{CDCl}_3$ , 25 °C) of PEE- $\text{GC}_2$ .

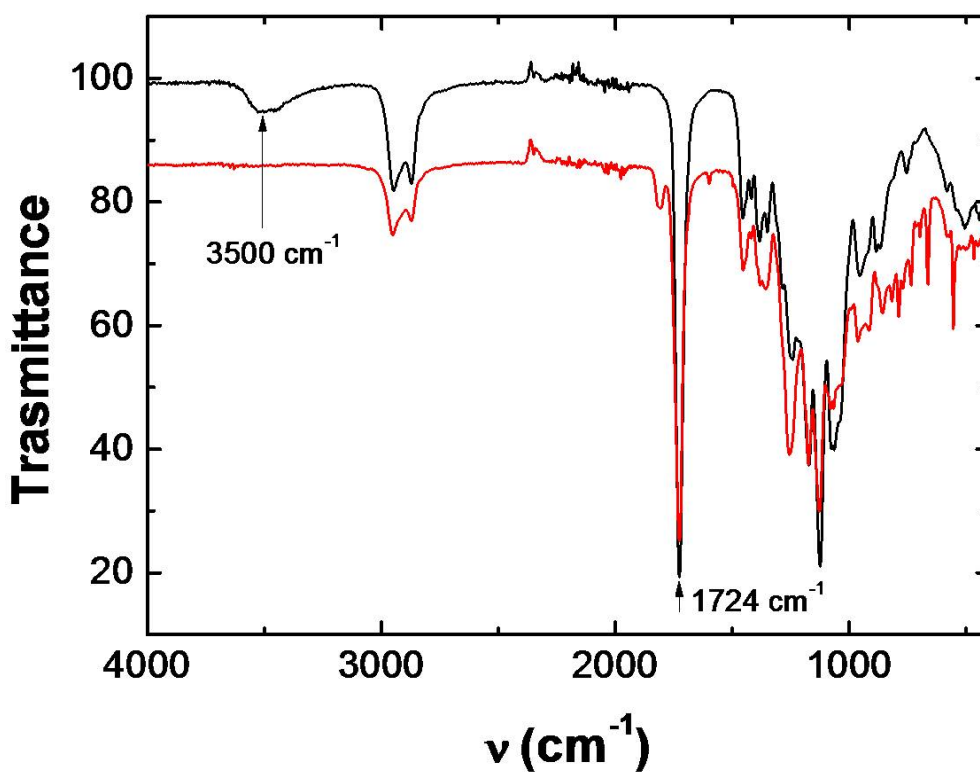

Figure S18. FTIR spectra of PEE-OH<sub>2</sub> (black trace) and the resulting PEE-GC<sub>2</sub> (red trace).

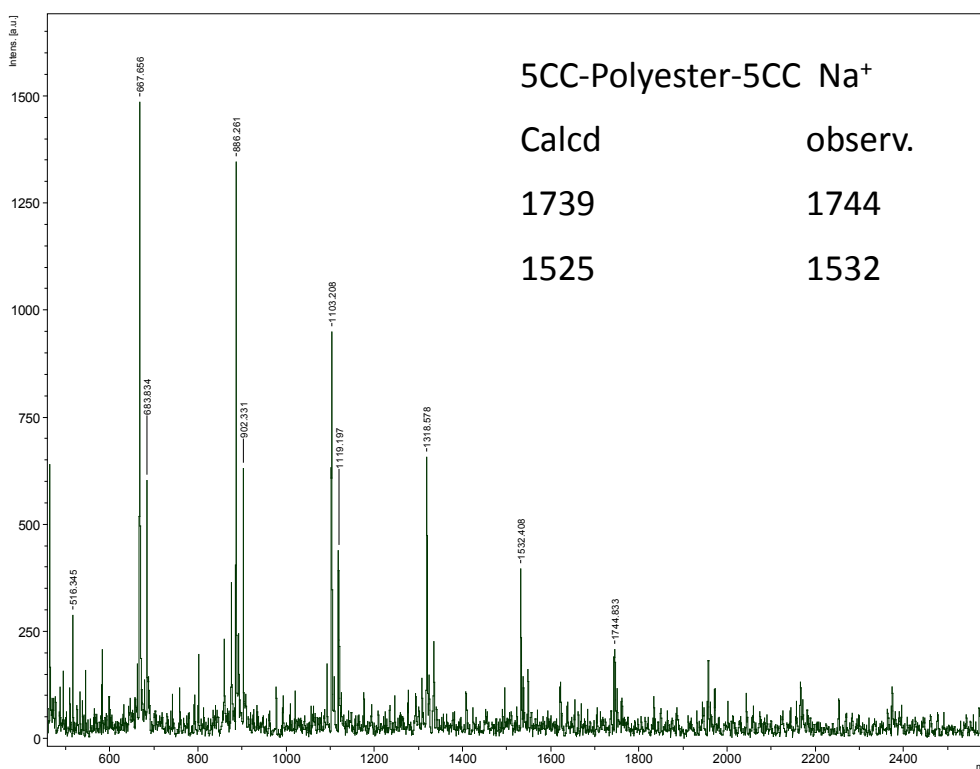

Figure S19. MALDI-ToF MS spectrum of PEE-GC<sub>2</sub>.

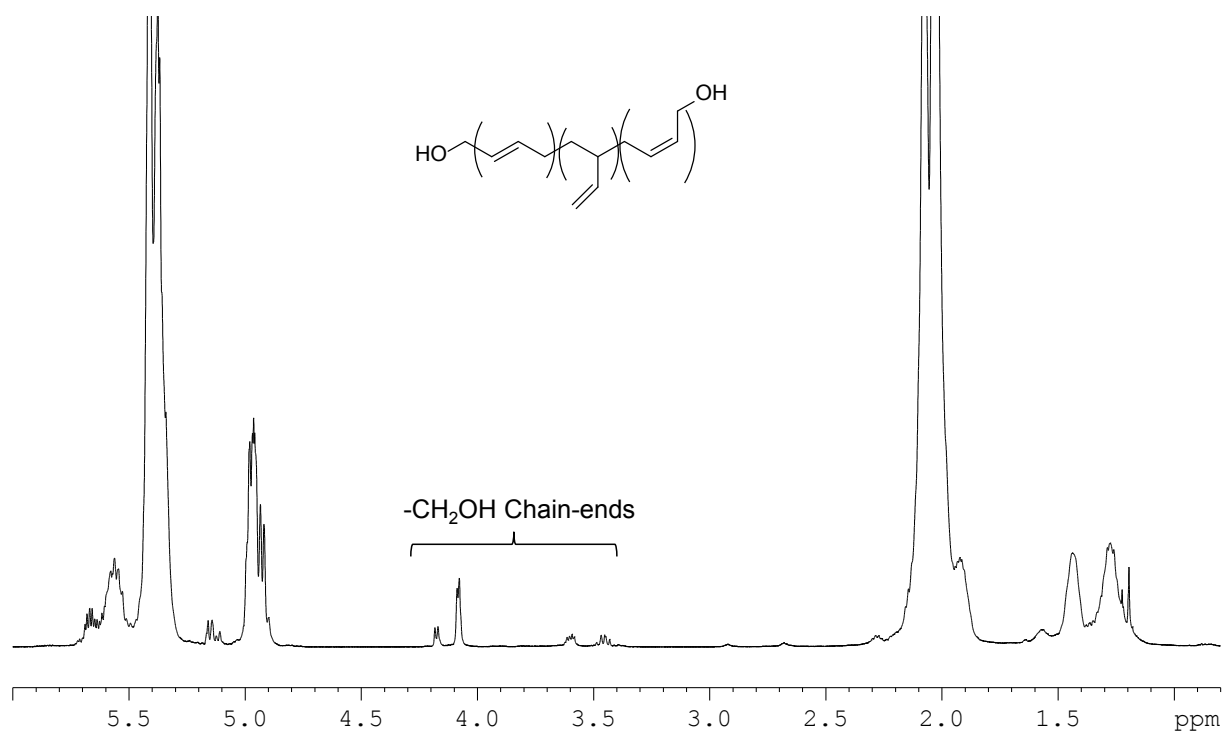

**Figure S20.** <sup>1</sup>H NMR (500 MHz, CDCl<sub>3</sub>, 25 °C) spectrum of PBD-OH<sub>2</sub>.

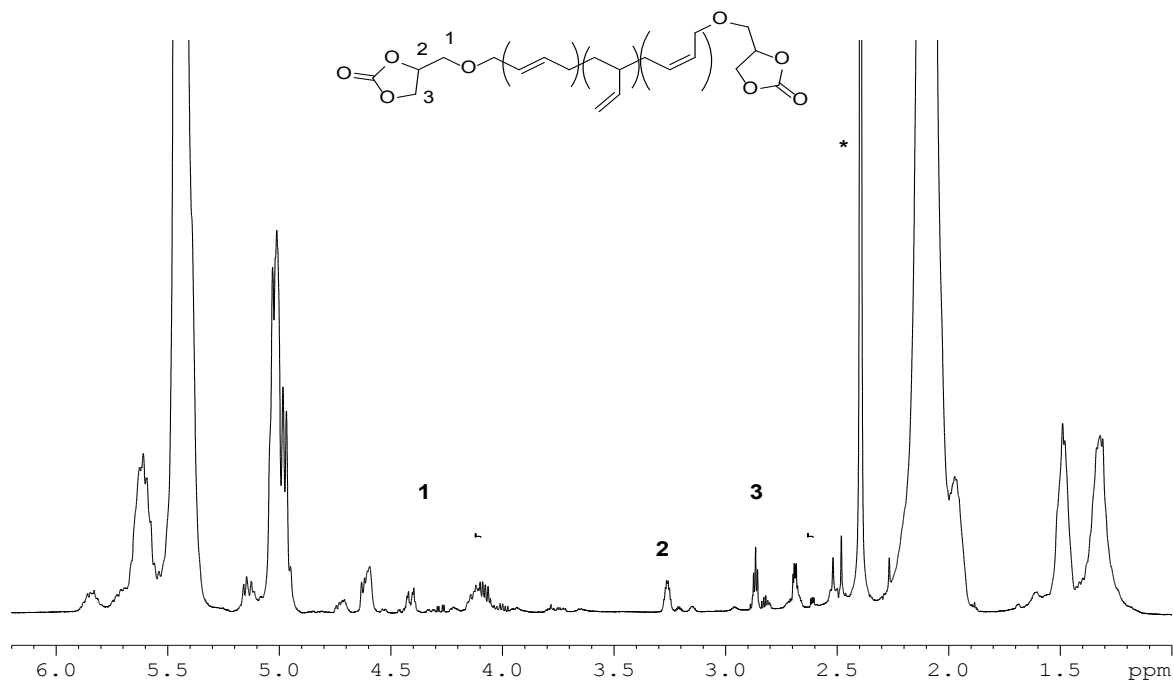

**Figure S21.** <sup>1</sup>H NMR (500 MHz, CDCl<sub>3</sub>, 25 °C) spectrum of PBD-GC<sub>2</sub> (\* marker stands for residual toluene).

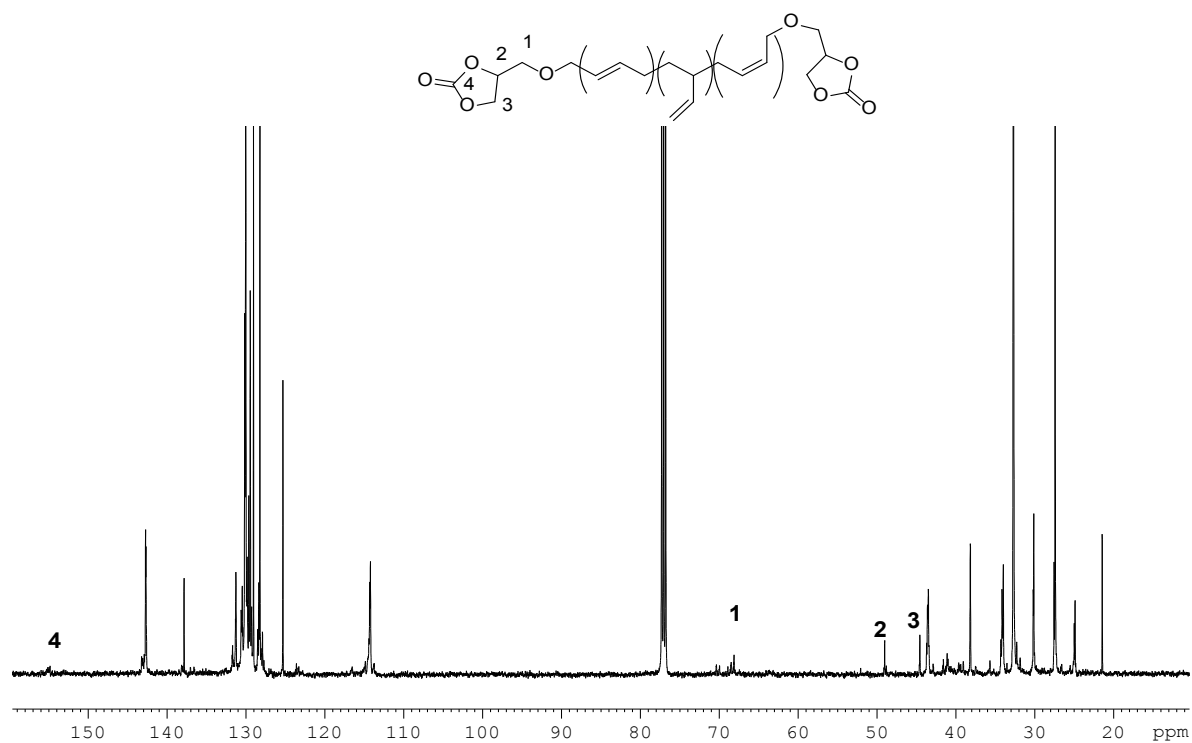

**Figure S22.** <sup>13</sup>C{<sup>1</sup>H} NMR (125 MHz, CDCl<sub>3</sub>, 25 °C) spectrum of PBD-GC<sub>2</sub>.

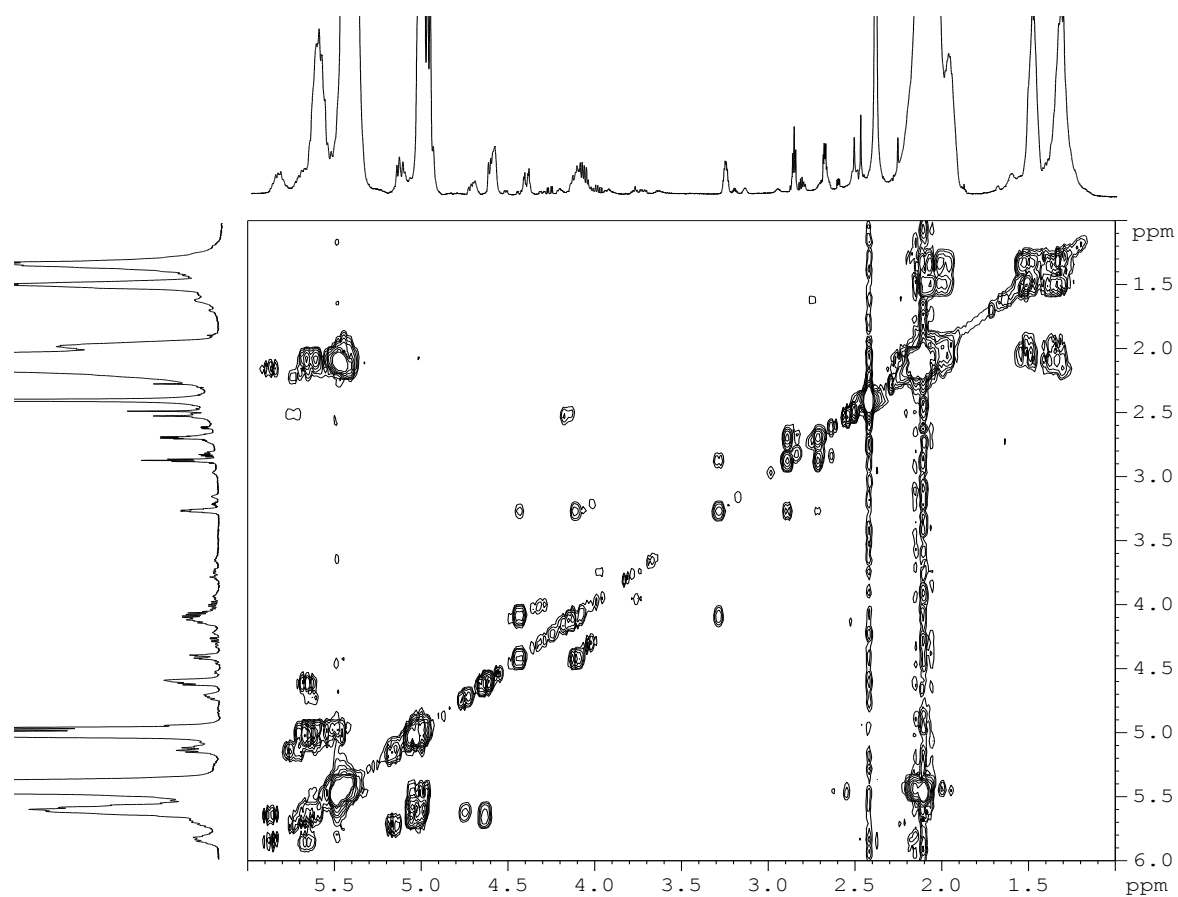

**Figure S23.** <sup>1</sup>H-<sup>1</sup>H COSY NMR (500 MHz, CDCl<sub>3</sub>, 25 °C) spectrum of PBD-GC<sub>2</sub>.

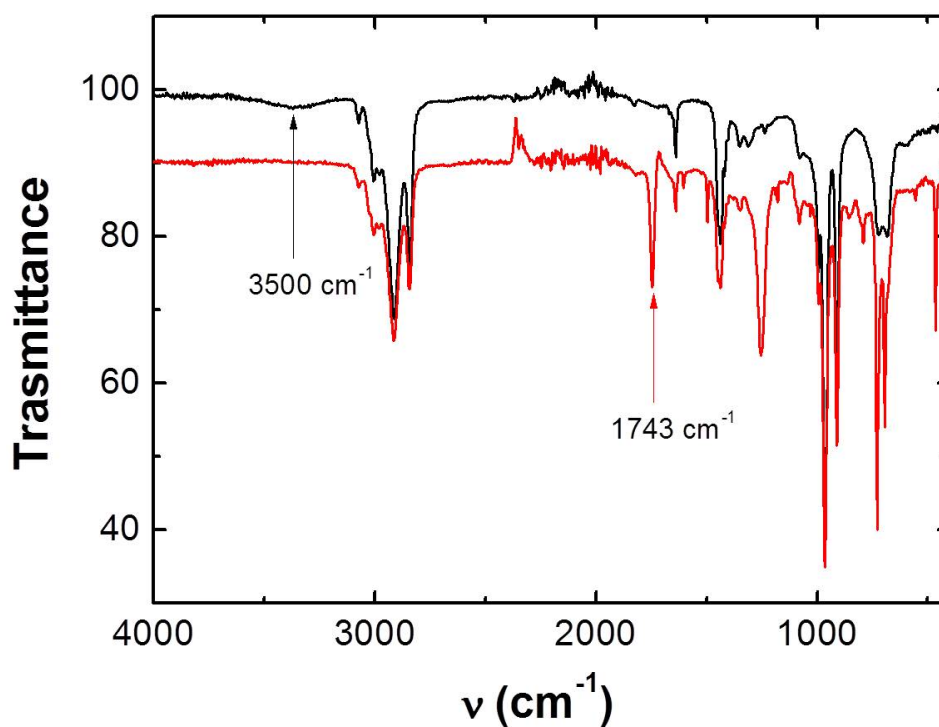

**Figure S24.** FTIR spectra of PBD-OH<sub>2</sub> (black trace) and the resulting PBD-GC<sub>2</sub> (red trace).

**Scheme S1.** Synthesis of 4-tosylmethyl-1,3-dioxolan-2-one (GC-OTs).

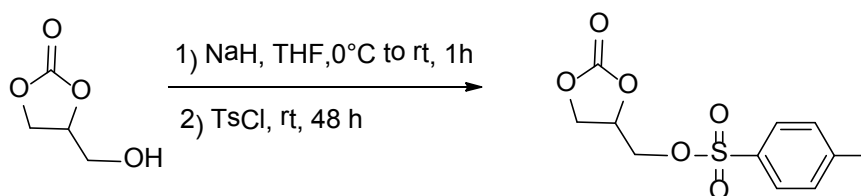

**Table S1.**  $\alpha,\omega$ -Dihydroxy and dicyclocarbonate telechelic PEGs characteristics.

|                                      | $M_{n,SEC}^b$ | $D_M^b$ |
|--------------------------------------|---------------|---------|
| PEG <sub>400</sub> -OH <sub>2</sub>  | -             | -       |
| PEG <sub>400</sub> -GC <sub>2</sub>  | -             | -       |
| PEG <sub>4000</sub> -OH <sub>2</sub> | 3950          | 1.10    |
| PEG <sub>4000</sub> -GC <sub>2</sub> | 4400          | 1.18    |

<sup>a</sup> Determined by SEC in THF at 30 °C vs. polystyrene standards (uncorrected  $M_n$  values).



**Table S2.**  $\alpha,\omega$ -Dihydroxy and dicyclocarbonate telechelic PEE characteristics.

|                     | $M_{n,NMR}^a$ | $M_{n,SEC}^b$ | $D_M^b$ |
|---------------------|---------------|---------------|---------|
| PEE-OH <sub>2</sub> | 1000          | 1040          | 2.24    |
| PEE-GC <sub>2</sub> | 1200          | 1090          | 2.14    |

<sup>a</sup> Determined by NMR analysis of the isolated polymer, from <sup>1</sup>H resonances of both terminal groups <sup>b</sup> Determined by SEC in THF at 30 °C vs. polystyrene standards (uncorrected  $M_n$  values).

**Table S3.**  $\alpha,\omega$ -Dihydroxy and dicyclocarbonate telechelic PBD characteristics.

|                     | $M_{n,SEC}^a$ | $D_M^a$ | % 1,4-cis units | % 1,4-trans units | % 1,2 units |
|---------------------|---------------|---------|-----------------|-------------------|-------------|
| PBD-OH <sub>2</sub> | 3450          | 2.4     | 20.0            | 60.0              | 20.0        |
| PBD-GC <sub>2</sub> | 3800          | 2.29    | 20.0            | 60.0              | 20.0        |

<sup>a</sup> Determined by SEC in THF at 30 °C vs. polystyrene standards (uncorrected  $M_n$  values).
